# Supplementary material for: A novel terpene synthase controls differences in anti-aphrodisiac pheromone production between closely related Heliconius butterflies
Source: PLOS journal article supplement (doi:10.1371/journal.pbio.3001022), 2021-01-19

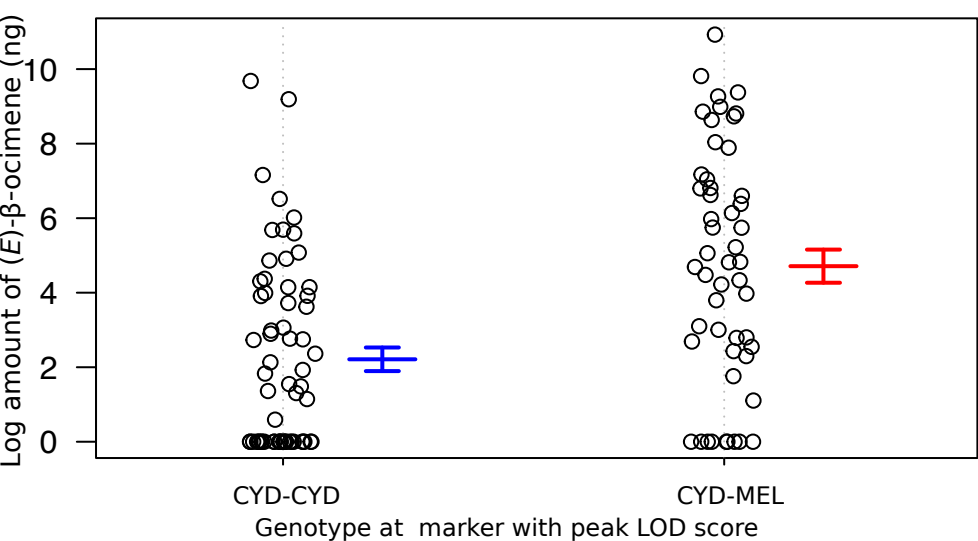

Supplement: S2 (10.1371/journal.pbio.3001022.s002) [file journal.pbio.3001022.s002]
